# Supplementary material for: Evaporation-induced self-assembly of quantum dots-based concentric rings on polymer-based nanocomposite films
Source: Royal Society of Chemistry journal article supplement (doi:10.1039/c6sm01417h), 2016-01-01
Supplement: c6sm01417h1.pdf [file c6sm01417h1.pdf]

## Evaporation-induced self-assembly of quantum dots-based concentric rings on polymer-based nanocomposite films

Shaofu Zhang <sup>a</sup>, Weiling Luan <sup>a\*</sup>, Qixin Zhong <sup>a</sup>, Shaofeng Yin <sup>a</sup>, Fuqian Yang <sup>b\*</sup>

<sup>a</sup> Key Laboratory of Pressure Systems and Safety (MOE), School of Mechanical and Power Engineering, East China University of Science and Technology, Shanghai 200237, P. R. China.

E-mail: luan@ecust.edu.cn

<sup>b</sup> Materials Program, Department of Chemical and Materials Engineering, University of Kentucky, Lexington, KY 40513, USA. E-mail: fyang2@uky.edu

### Supporting Information.

Video S1. Formation process of the concentric rings on a PMMA-QDs film via the evaporation of a pure chloroform droplet (diameter of the steel ball: 500  $\mu\text{m}$ , film thickness:  $120\pm 10$  nm, concentration of QDs in chloroform: 10 mg/mL, concentration of PMMA in chloroform: 10 mg/mL).

Figure S1: Surface structures formed on the surface of a PMMA-QDs film (Film thickness: 220 nm, concentration of QDs: 30 mg/ml, and concentration of PMMA: 10 mg/ml)

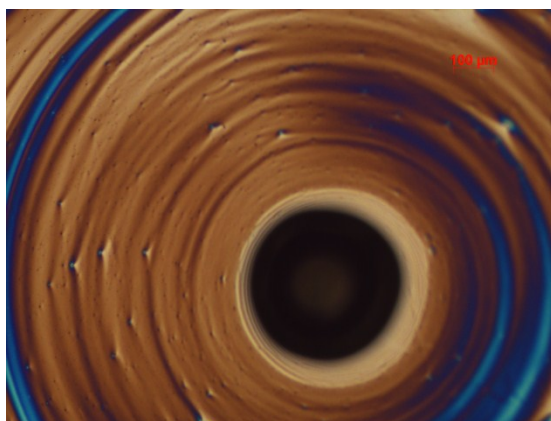

Figure S1. Surface structures formed on the surface of a PMMA-QDs film (Film thickness: 220 nm, concentration of QDs: 30 mg/ml, and concentration of PMMA: 10 mg/ml)
